# Supplementary material for: Nuclear Magnetic Resonance metabolomics reveals an excretory metabolic signature of renal cell carcinoma
Source: Sci Rep. 2016 Nov 18;6:37275. doi: 10.1038/srep37275 (PMC5114559; doi:10.1038/srep37275)

## **Nuclear Magnetic Resonance metabolomics reveals an excretory metabolic signature of renal cell carcinoma**

Márcia S. Monteiro<sup>1,\*</sup>, António S. Barros<sup>2</sup>, Joana Pinto<sup>2</sup>, Márcia Carvalho<sup>1,3</sup>, Ana S. Pires-Luís<sup>4,5</sup>, Carmen Jerónimo<sup>4,6</sup>, Rui Henrique<sup>4,5,6</sup>, Maria de Lourdes Bastos<sup>1</sup>, Ana M. Gil<sup>2,\*†</sup>, Paula Guedes de Pinho<sup>1,†</sup>

<sup>1</sup>UCIBIO@REQUIMTE, Laboratory of Toxicology, Faculty of Pharmacy, University of Porto, Porto, Portugal.

<sup>2</sup>CICECO- Instituto de Materiais de Aveiro (CICECO/UA), Universidade de Aveiro, Aveiro, Portugal.

<sup>3</sup>UCIBIO@REQUIMTE, Laboratory of Toxicology, Faculty of Pharmacy, University of Porto, Porto, Portugal. FP-ENAS, CEBIMED, Fundação Ensino e Cultura Fernando Pessoa, Porto, Portugal.

<sup>4</sup>Cancer Biology & Epigenetics Group, Research Center (CI-IPOP) Portuguese Oncology Institute-Porto (IPO-Porto), Porto, Portugal.

<sup>5</sup>Department of Pathology, Portuguese Oncology Institute-Porto (IPO-Porto), Porto, Portugal.

<sup>6</sup>Department of Pathology and Molecular Immunology-Biomedical Sciences Institute (ICBAS), University of Porto, Porto, Portugal.

**Table S1.** List of metabolites assigned in the 500 MHz  $^1\text{H}$  NMR spectra of human urine from controls and RCC patients, pH 7.00 $\pm$ 0.02. s: singlet, d: doublet, t: triplet, q: quartet, dd: doublet of doublets, m: multiplet, br: broad. <sup>a</sup> Metabolites assigned through STOCSY. <sup>b</sup> Tentative assignment. 2-HIBA: 2-hydroxy-isobutyrate; 2-KG: 2-ketoglutarate; 2-Py: *N*-methyl-2-pyridone-5-carboxamide; 3-HBA: 3-hydroxy-butyrate; 3-HIVA: 3-hydroxy-isovalerate; 4-DEA: 4-deoxyerythronic acid; 4-DTA: 4-deoxythreonic acid; DMA: dimethylamine; DMG: dimethylglycine; GAA: guanidinoacetate; IS: indoxyl sulfate; *p*-CS: *p*-cresol sulfate; PAG: phenylacetylglutamine; TMA: trimethylamine; TMAO: trimethylamine-N-oxide.

| Assignment                                  | $\delta_{\text{H}}$ ppm (multiplicity)                        |
|---------------------------------------------|---------------------------------------------------------------|
| 1,6-anhydroglucose                          | 5.46 (s), 3.69 (m), 3.54 (m), 4.10 (dd), 4.62 (dd), 3.76 (dd) |
| 1-methyl-histidine <sup>a</sup>             | 7.78 (s), 7.05 (s), 3.96 (dd), 3.72 (s), 3.16 (dd), 3.07 (dd) |
| 2-HIBA                                      | 1.36 (s)                                                      |
| 2-KG                                        | 2.45 (t), 3.01 (t)                                            |
| 2-Py                                        | 8.33 (s), 7.98 (d), 6.67 (d), 3.63 (s)                        |
| 3-HBA                                       | 1.20 (d), 2.32 (m), 2.42 (m), 4.16 (m)                        |
| 3-HIVA <sup>a</sup>                         | 1.27 (s), 2.37 (s)                                            |
| 3-methyl-histidine                          | 8.11 (s), 7.15 (s), 3.97 (dd), 3.75 (s), 3.30 (d)             |
| 4-deoxyerythronic acid (4-DEA) <sup>b</sup> | 1.11 (d), 4.08 (d), 4.11 (m)                                  |
| 4-deoxythreonic acid (4-DTA) <sup>b</sup>   | 1.24 (d), 3.84 (dd), 4.11 (m)                                 |
| 4-hydroxy-hippurate                         | 7.76 (dd), 6.97 (d), 3.96 (s)                                 |
| 4-hydroxyphenylacetate <sup>a</sup>         | 6.88 (d), 3.45 (s), 7.16 (d)                                  |
| 4-pyridoxic acid <sup>b</sup>               | 7.53 (s), 4.51 (s), 2.31 (s)                                  |
| 9-methyl-uric acid <sup>b</sup>             | 3.16 (s)                                                      |
| Acetate                                     | 1.93 (s)                                                      |
| Acetoacetate                                | 2.27 (s)                                                      |
| Acetone                                     | 2.24 (s)                                                      |
| Alanine                                     | 1.49 (d), 3.78 (q)                                            |
| Allantoin                                   | 5.39 (s)                                                      |
| Ascorbate                                   | 4.53 (d), 4.01 (m), 3.77 (m)                                  |
| Bile acid <sup>b</sup>                      | 0.54 (s)                                                      |
| Bile acid <sup>b</sup>                      | 0.57 (s)                                                      |
| Betaine <sup>a</sup>                        | 3.91 (s), 3.27 (s)                                            |
| Carnitine <sup>a</sup>                      | 2.43 (dd), 3.23 (s), 3.43 (m), 4.58 (m)                       |
| Choline                                     | 3.20 (s), 3.52 (m), 4.08 (m)                                  |
| <i>cis</i> -aconitate                       | 5.72 (t), 3.12 (d)                                            |
| Citrate                                     | 2.54 (d), 2.69 (d)                                            |
| Creatine                                    | 3.03 (s), 3.93 (s)                                            |
| Creatinine                                  | 3.05 (s), 4.06 (s)                                            |
| DMA                                         | 2.73 (s)                                                      |
| DMG                                         | 2.93 (s), 3.72 (s)                                            |
| Formate                                     | 8.46 (s)                                                      |
| Fumarate                                    | 6.53 (s)                                                      |
| Furoylglycine                               | 7.68 (d), 7.14 (dd), 6.65 (q), 3.94 (d)                       |

|                            |                                                                                                         |
|----------------------------|---------------------------------------------------------------------------------------------------------|
| Galactose                  | 5.28 (d), 4.60 (d), 4.01 (d), 3.98 (d), 3.92 (d), 3.84 (d),<br>3.72 (m), 3.64 (dd), 3.49 (dd)           |
| Glucose ( $\alpha$ anomer) | 4.66 (d), 3.91 (m), 3.73 (dd), 3.50 (t), 3.43 (m), 3.23 (dd)                                            |
| Glucose ( $\beta$ anomer)  | 5.25 (d), 3.84 (m), 3.77 (dd), 3.72 (t), 3.54 (dd), 3.42 (t)                                            |
| Glutamate                  | 3.75 (dd), 2.34 (m), 2.12 (m), 2.04 (m)                                                                 |
| Glutamine                  | 3.77 (t), 2.44 (m), 2.14 (m),                                                                           |
| GAA                        | 3.81 (s)                                                                                                |
| Glycine                    | 3.57 (s)                                                                                                |
| Hippurate                  | 8.53 (s, br), 7.84 (d), 7.64 (t), 7.56 (t), 3.97 (d)                                                    |
| Histidine                  | 7.98 (s), 7.13 (s), 4.01 (dd), 3.29 (s), 3.20 (dd)                                                      |
| Hypoxanthine               | 8.22 (s), 8.20 (s)                                                                                      |
| IS                         | 7.70 (d), 7.50 (d), 7.36 (s), 7.28 (dd), 7.21 (dd)                                                      |
| Isoleucine                 | 0.94 (t), 0.98 (d), 1.26 (m), 1.46 (m), 1.99 (m), 3.62 (d)                                              |
| Lactate                    | 4.11 (q), 1.34 (d)                                                                                      |
| Lactose                    | 5.26 (d), 4.48 (d), 3.94 (m), 3.86 (m), 3.79 (m), 3.73 (m),<br>3.66 (m), 3.59 (dd), 3.55 (m), 3.28 (dd) |
| Leucine                    | 0.95 (d), 1.70 (m), 3.72 (t)                                                                            |
| Lysine                     | 1.46 (d), 1.73 (m), 1.93 (m), 3.01 (t), 3.78 (t)                                                        |
| Maleate                    | 6.03 (s)                                                                                                |
| Malonate                   | 3.11 (s)                                                                                                |
| Mannose                    | 5.18 (d), 3.92 (m), 3.88 (dd), 3.85 (m), 3.81 (m), 3.74 (m),<br>3.65 (m), 3.58 (t), 3.38 (dd)           |
| Methanol                   | 3.34 (s)                                                                                                |
| <i>p</i> -CS               | 2.35 (s), 7.29 (d), 7.21 (d)                                                                            |
| PAG                        | 7.43 (m), 7.37 (m), 4.18 (m), 3.67 (d), 2.28 (t), 2.10 (m),<br>1.93 (m)                                 |
| Pyruvate                   | 2.41 (s)                                                                                                |
| <i>Scyllo</i> -inositol    | 3.37 (s)                                                                                                |
| Succinate                  | 2.42 (s)                                                                                                |
| Sucrose                    | 5.42 (d), 4.24 (d), 4.06 (t), 3.89 (m), 3.85 (m), 3.83 (dd),<br>3.78 (t), 3.63 (s), 3.56 (dd), 3.48 (t) |
| Tartrate                   | 4.35 (s)                                                                                                |
| Taurine <sup>a</sup>       | 3.43 (t), 3.26 (t)                                                                                      |
| Threonine                  | 4.26 (m), 3.61 (d), 1.33 (d)                                                                            |
| Trigonellinamide           | 9.28 (s), 8.97 (d), 8.90 (d), 4.50 (s)                                                                  |
| Trigonelline               | 9.13 (s), 8.84 (s, br), 8.09 (t), 4.44 (s)                                                              |
| TMA                        | 3.90 (s)                                                                                                |
| TMAO                       | 3.28 (s)                                                                                                |
| Tyrosine                   | 7.20 (d), 6.91 (d), 3.95 (dd), 3.20 (dd), 3.06 (dd)                                                     |
| Urea                       | 5.80 (s, br)                                                                                            |
| Valine                     | 2.27 (m), 1.05 (d), 0.99 (d), 3.61 (d)                                                                  |
| Xylose                     | 5.21 (d), 4.56 (d), 3.93 (dd), 3.63 (m), 3.54 (dd), 3.42 (t),<br>3.33 (dd), 3.23 (dd)                   |

---

**Table S2.** Results obtained by MCCV (500 iterations) of PLS-DA models built for: Controls and RCC patients: unmatched controls vs RCC, age- and gender-matched controls vs RCC, unmatched controls vs RCC with 32 signal integrals with univariate statistical relevance; controls alone: age  $\leq$  60 yrs vs age  $>$  60 yrs, females vs males; RCC patients alone: BMI  $<$  25 vs BMI  $\geq$  25, (smokers and ex-smokers) vs. non-smokers, non-ccRCC subtypes vs ccRCC, RCC stages I and II vs. RCC stages III and IV.  $Q^2$ : predictive power, Sens: sensitivity, Spec: specificity, CR: classification rate. \* and \*\*: models obtained using the 32 integrals and 23 integrals (no bias resonances), respectively, found to vary with univariate statistical relevance (p-value  $<$  0.05 in Table 3). \*\*\* only matching according to age was possible.

|                                                                          | No variable selection |             |             |           | With variable selection |             |             |           |
|--------------------------------------------------------------------------|-----------------------|-------------|-------------|-----------|-------------------------|-------------|-------------|-----------|
|                                                                          | Median<br>$Q^2$       | Sens<br>(%) | Spec<br>(%) | CR<br>(%) | Median<br>$Q^2$         | Sens<br>(%) | Spec<br>(%) | CR<br>(%) |
| <b>Control and RCC subjects</b>                                          |                       |             |             |           |                         |             |             |           |
| Controls (n=49) vs<br>RCC (n=39)                                         | 0.31                  | 74          | 91          | 83        | 0.59                    | 86          | 96          | 92        |
| Controls (n=28) vs<br>RCC (n=28) (age- and<br>gender-matched)            | 0.21                  | 61          | 81          | 71        | 0.67                    | 85          | 90          | 88        |
| Controls (n=49) vs<br>RCC (n=39) using 32<br>signal integrals *          | 0.68                  | 86          | 97          | 92        | -                       | -           | -           | -         |
| Controls (n=49) vs<br>RCC (n=39) using 23<br>signal integrals **         | 0.75                  | 91          | 98          | 95        | -                       | -           | -           | -         |
| <b>Control subjects only</b>                                             |                       |             |             |           |                         |             |             |           |
| Age $\leq$ 60 yrs (n=20) vs<br>age $>$ 60 yrs (n=29)<br>(gender-matched) | 0.09                  | 65          | 65          | 65        | 0.44                    | 88          | 94          | 90        |
| Females (n=15) vs Males<br>(n=15) (age-matched)                          | -0.29                 | 67          | 66          | 66        | 0.46                    | 85          | 100         | 93        |
| <b>RCC subjects only</b>                                                 |                       |             |             |           |                         |             |             |           |
| Non-smokers (n=25) vs<br>smokers (n=12)                                  | 0.02                  | 66          | 90          | 83        | 0.41                    | 75          | 96          | 89        |
| BMI $<$ 25 (n=12) vs.<br>BMI $\geq$ 25 (n=24)                            | -0.11                 | 78          | 27          | 63        | 0.45                    | 89          | 66          | 81        |
| Other subtypes (n=15) vs.<br>ccRCC (n=24)                                | -0.04                 | 68          | 42          | 58        | 0.63                    | 92          | 90          | 91        |
| Stages I and II (n=27) vs.<br>Stages III and IV (n=12)                   | -0.22                 | 25          | 84          | 66        | 0.35                    | 55          | 91          | 80        |



**Figure S1.** List of metabolites assigned in the 500 MHz  $^1\text{H}$  NMR spectra of human urine from controls and RCC patients, pH  $7.00 \pm 0.02$ . s: singlet, d: doublet, t: triplet, q: quartet, dd: doublet of doublets, m: multiplet, br: broad. <sup>a</sup> Metabolites assigned through STOCSY. <sup>b</sup> Tentative assignment. 2-HIBA: 2-hydroxy-isobutyrate; 2-KG: 2-ketoglutarate; 2-Py: *N*-methyl-2-pyridone-5-carboxamide; 3-HBA: 3-hydroxy-butyrate; 3-HIVA: 3-hydroxy-isovalerate; 4-DEA: 4-deoxyerythronic acid; 4-DTA: 4-deoxythreonic acid; DMA: dimethylamine; DMG: dimethylglycine; GAA: guanidinoacetate; IS: indoxyl sulfate; *p*-CS: *p*-cresol sulfate; PAG: phenylacetylglutamine; TMA: trimethylamine; TMAO: trimethylamine-N-oxide.

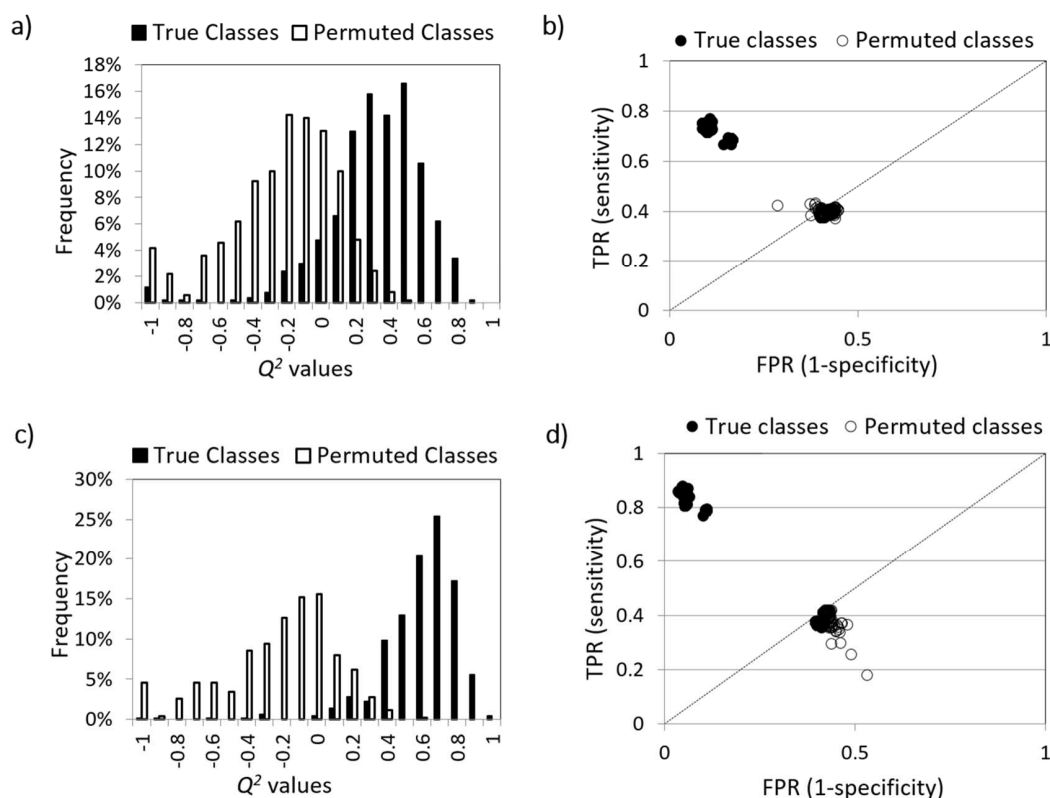

**Figure S2.** PLS-DA scores scatter plots (left) and corresponding LV1 loadings (right) obtained for variable selected  $^1\text{H}$  NMR spectra of urine from a) age-matched sub-cohort of control females (o,  $n=15$ ) vs control males ( $\bullet$ ,  $n=15$ ); b) controls with age  $\leq 60$  ( $\diamond$ ,  $n=20$ ) vs controls with age  $>60$ , ( $\blacklozenge$ ,  $n=29$ ). All models were obtained with no. LV=2. The ellipses indicate the 95% confidence limits. The loadings plots are colored according to variable importance to the projection (VIP) and relevant assignments are indicated.

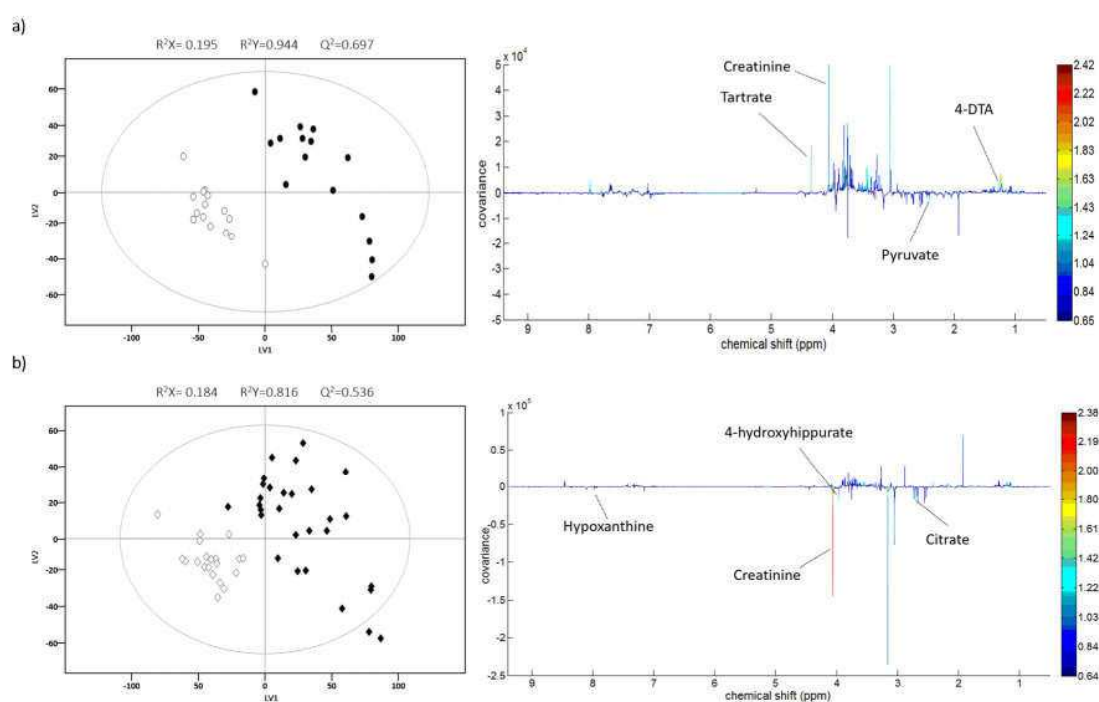

Supplement: Supplementary Tables and Figures [file srep37275-s1.pdf]
